# Supplementary material for: A light-driven artificial flytrap
Source: PubMed Central journal article supplement (PMC5457518; doi:10.1038/ncomms15546), 2017-05-23
Supplement: ncomms15546-s1.pdf [file ncomms15546-s1.pdf]

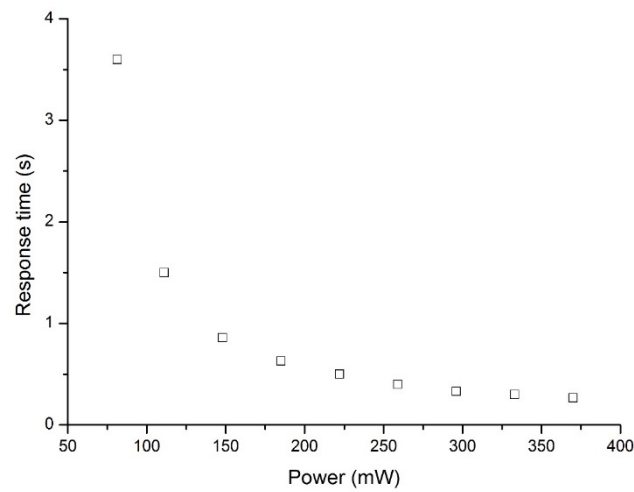

**Supplementary Figure 1|. Closure speed vs. light power.** A 4 mm sized flytrap gripper closes at a scattering cubic target driven by different laser powers. The response time is defined as the time between starting the irradiation and the moment when the gripper reaches the closure stage.

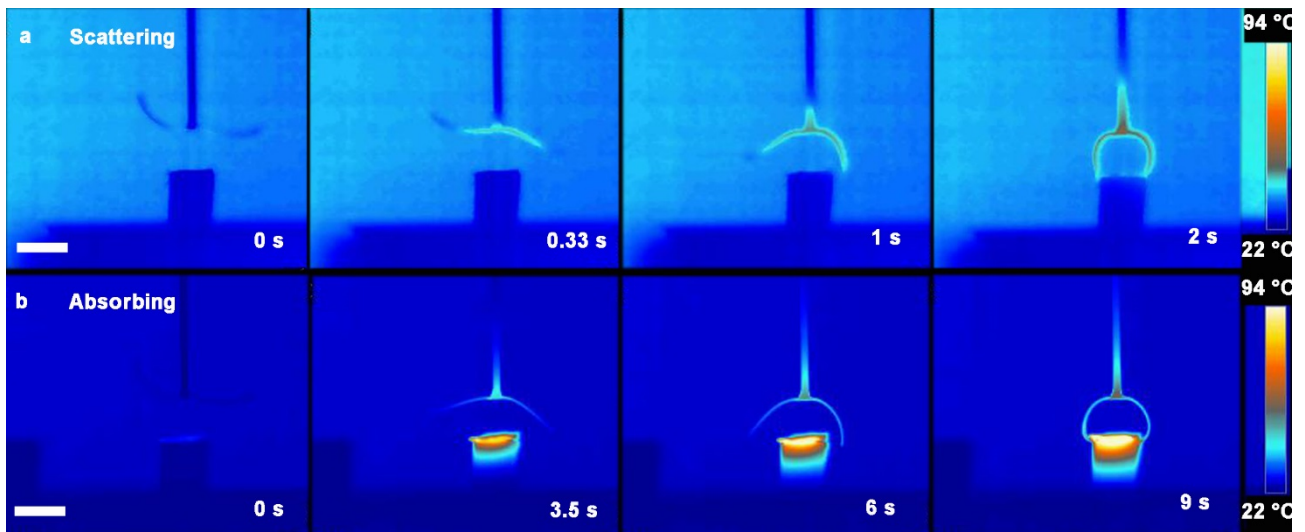

**Supplementary Figure 2|. Thermal image of optical flytrap.** Flytrap gripper at difference stages in front of scattering (**a**) and absorbing (**b**) targets. Laser power  $P = 94$  mW. Scale bar: 2 mm.

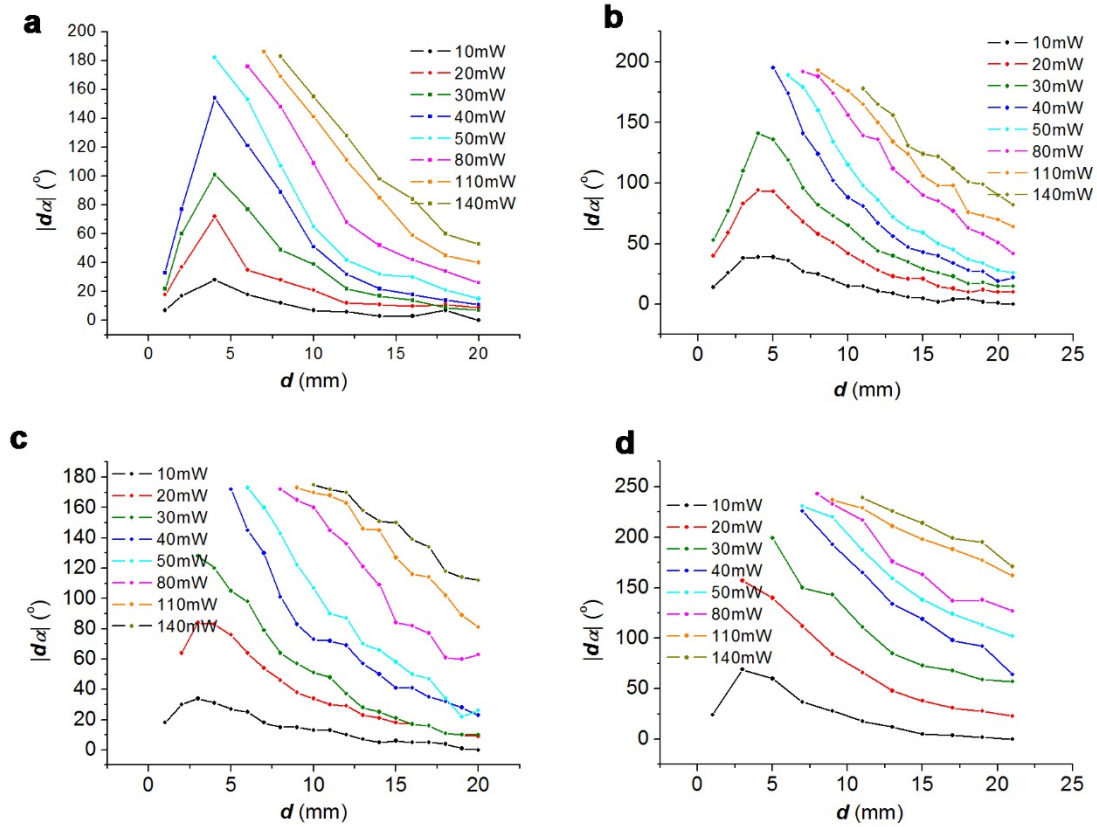

**Supplementary Figure 3]. Size-dependent closure behavior in front of a mirror.** Change of gripper angle  $|d\alpha|$  as a function of distance  $d$  to the mirror surface at different light powers  $P$ . The LCE actuators used are 4 (**a**), 6 (**b**), 8 (**c**) and 10 (**d**) mm in length, 1 mm in width, and 20  $\mu\text{m}$  in thickness.

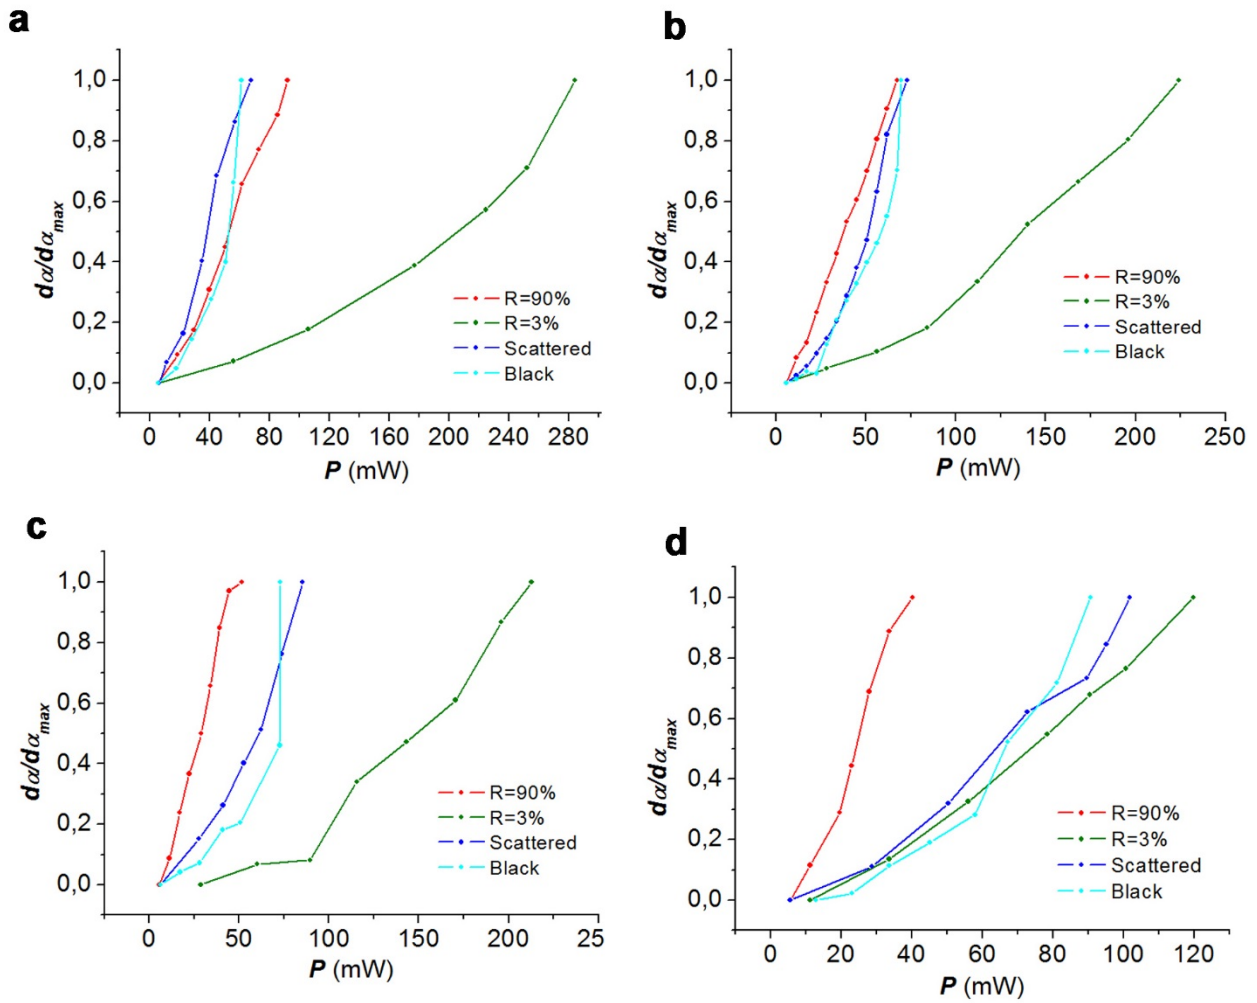

**Supplementary Figure 4|. Self-recognition properties in different sized flytrap.** Bending ratio  $d\alpha/d\alpha_{max}$  as a function of light power  $P$  in front of high-reflectivity ( $R$ : 90%), low-reflectivity ( $R$ : 3%), black ( $R$ :  $< 1\%$ ) and highly scattering targets. The LCE actuators used are 4 (a), 6 (b), 8 (c) and 10 (d) mm in length, 1 mm in width, and 20  $\mu\text{m}$  in thickness.

### Supplementary Note 1: Order parameter.

In order to measure the order parameter of the polymeric network, a uniaxially aligned liquid crystalline elastomer (LCE) thin film was prepared using the same polymerization conditions as for the splay-aligned film used for preparing flytrap, and its absorption spectra parallel and perpendicular to the molecular director were measured. The LC cell was formed by using PVA-coated glass slides (rubbed in the same direction) with a separation distance of 5  $\mu\text{m}$ , followed by infiltration of the same LC monomer mixture, polymerized in an identical manner as explained in the Methods Section. The polarized absorption spectra are shown in **Supplementary Figure 5**.

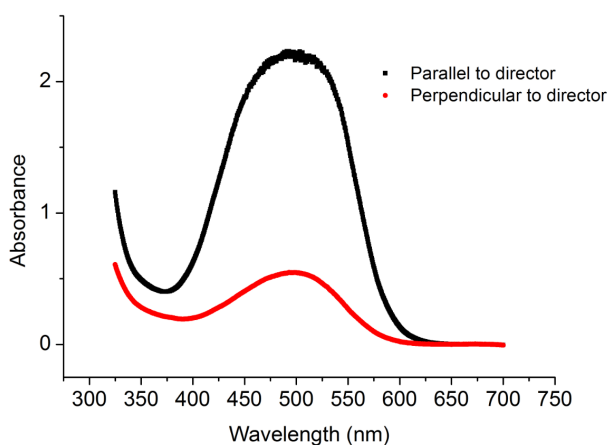

**Supplementary Figure 5.** Polarized absorption spectra of a homogeneously aligned LCE.

The order parameter,  $S_p$ , can be calculated as

$$S_p = \frac{A_{\parallel} - A_{\perp}}{A_{\parallel} + 2A_{\perp}}$$

where  $A_{\parallel}$  and  $A_{\perp}$  are the measured absorbance values with light polarized parallel and perpendicular to the LC alignment, respectively.  $S_p$  is determined to be 0.59 for the homogeneously aligned sample, by averaging the data in wavelength range 525 – 575 nm.

**Supplementary Note 2: Bending-angle calculation.**

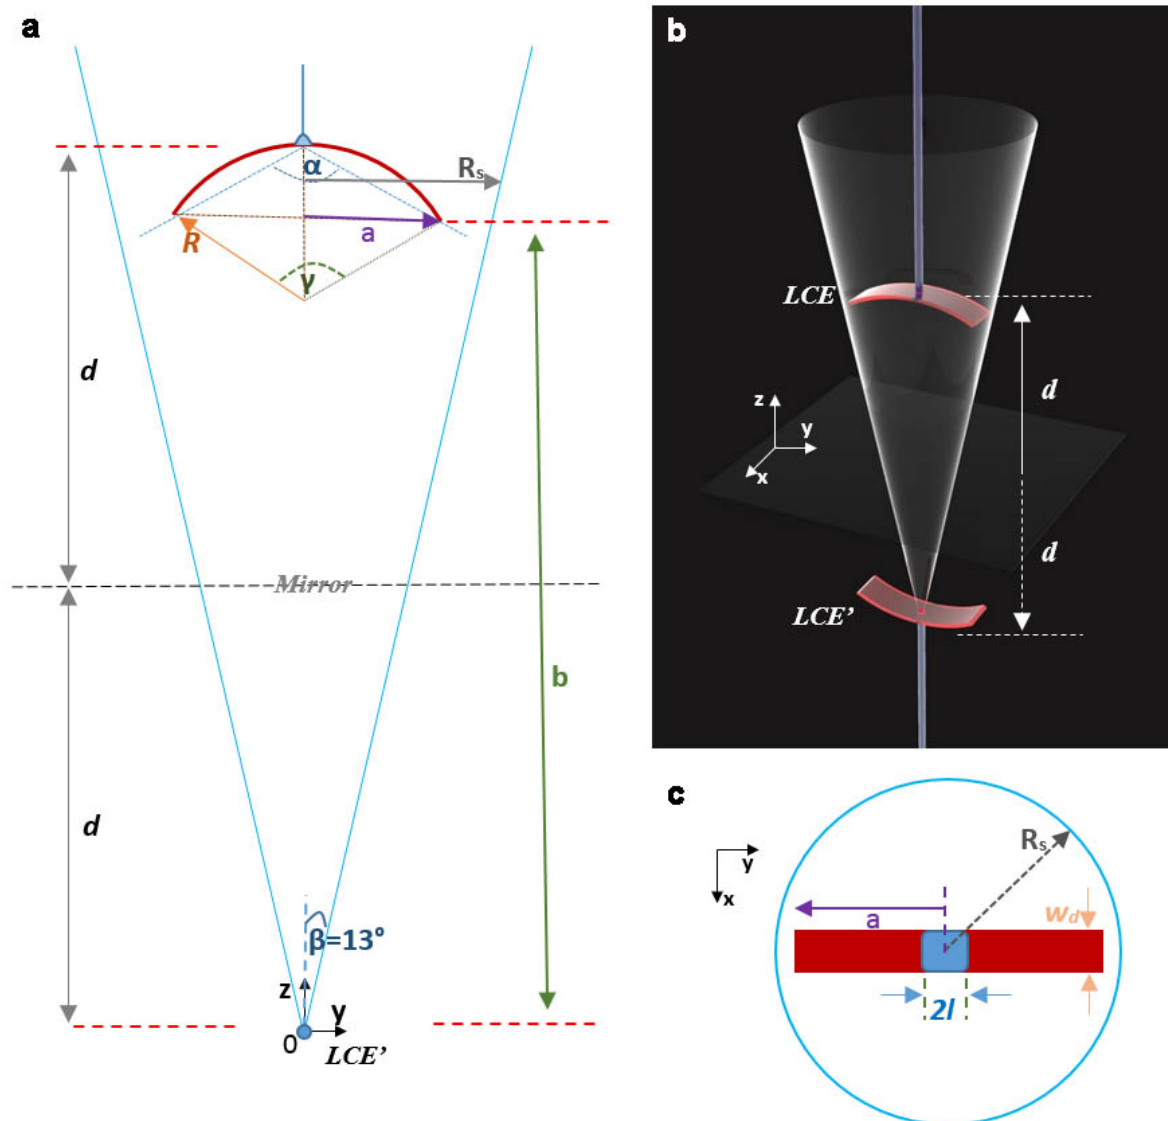

**Supplementary Figure 6.** Schematic drawing of light-induced deformation in the optical flytrap geometry.

The deformed gripper can be approximated as an arc with a central angle of  $\gamma$  and a curvature of  $1/R$ , as shown in **Supplementary Figure 6 (a)**. The relation between the measured gripping angle  $\alpha$  and the central angle  $\gamma$  is

$$\tan\left(\frac{\alpha}{2}\right) = \frac{\sin(\frac{\gamma}{2})}{1 - \cos(\frac{\gamma}{2})}. \quad (1)$$

The change of central angle  $d\gamma$  at an equilibrium stage depends on the absorbed light power  $E$  of the LCE stripe:

$$d\gamma = k \cdot E, \quad (2)$$

where  $k$  is the light-induced bending coefficient ( $k = 0.8 \text{ rad} \cdot \text{mW}^{-1}$  for a 6 mm long LCE stripe). The key of the calculation is to find out the specific form of  $E(P, d, \gamma)$ , which depends on light power  $P$ , distance  $d$  and the deformed geometry ( $\gamma$ ). For constant  $P$  and  $d$ , the LCE deforms into a well-defined, stable state. The central angle  $\gamma$  can be obtained by solving the equation

$$\gamma - \gamma_0 - k \cdot E(\gamma) = 0, \quad (3)$$

where  $\gamma_0$  is the original central angle of a 6 mm long LCE,  $\gamma_0 = -112^\circ$ ,  $\alpha_0 = 236^\circ$  (a negative value of  $\gamma_0$ , or say,  $\alpha_0 > 180^\circ$  is due to the inner stress in the photo-polymerized LCE film).

For a general case,  $E$  can be obtained using a surface integral

$$E = A \cdot P \cdot R \cdot \iint_S D(\theta, \varphi) \frac{\vec{r} d\vec{S}}{r^3} \quad (4)$$

where  $D(\theta, \varphi)$  is light density indicating the percentage of reflected light in  $d\Omega = \sin\theta d\theta d\varphi$  solid angle in spherical coordinates  $\langle r, \theta, \varphi \rangle$  ( $\oint D(\theta, \varphi) \cdot \sin(\theta) d\theta d\varphi = 1$ ), where  $R$  is the reflectivity of the surface,  $S$  is the area of actuated region of the LCE, and  $A$  is the absorbance of the LCE stripe ( $A = 0.8$  for the present case). Usually the form of  $E$  is very complicated, especially for irregularly-shaped and scattering surfaces.

We apply this calculation method to one of the simplest cases – bending in front of a flat mirror, as schematically illustrated in **Supplementary Figure 6b**. Due to the mirror symmetry, the whole light illumination can be considered as a light cone with its apex at the fiber tip mirror-symmetric position ( $LCE'$ ). The distance between the fiber tip and the light source is  $2d$ , and the entire absorption occurs inside the LCE stripe whose area depends on the bending arc geometry ( $\gamma$ ). As can be seen from **Supplementary Figure 6a**, we have relations

$$a = r \cdot \sin\left(\frac{\gamma}{2}\right) \quad (5)$$

$$b = 2 \cdot d - r + r \cdot \cos\left(\frac{\gamma}{2}\right) \quad (6)$$

$$\bar{d} = d + b/2 \quad (7)$$

where  $a$  is the horizontal distance between LCE edge and the fiber center,  $b$  is the vertical distance between LCE edge and the light source and  $\bar{d}$  an approximated average distance between the LCE and the light source.

**Supplementary Figure 6c** shows the schematics of the projection of LCE stripe with respect to the pointed light source on  $z = \bar{d}$  plane. The projected area can be approximated as a rectangle, whose length equals to  $2a$  and width  $w_d$  equals to the LCE width,  $w_d = 1\text{mm}$ . On  $z = \bar{d}$  plane, the reflected light spot has a radius of  $R_s = \bar{d} \cdot \tan(\beta)$  ( $\beta = 13^\circ$  is the divergence angle of light emitted from the fiber tip), and a Gaussian intensity distribution

$$I = \frac{P}{\pi\omega_0^2} e^{-\frac{x^2+y^2}{\omega_0^2}} \quad (8)$$

where  $\omega_0 = \frac{2}{3}R_s$  is the Gaussian beam radius.

For  $R_s > a$ ,

$$E = 2 \cdot A \cdot R \int_l^a I \cdot w_d dy. \quad (9)$$

For  $R_s \leq a$ ,

$$E = 2 \cdot A \cdot R \int_l^{R_s} I \cdot w_d dy, \quad (10)$$

where  $l = 0.5\text{ mm}$  is the half length of the non-actuated region on the LCE stripe (gluing part).

Combining Supplementary equations (9) and (10) with equation (3), using  $R = 0.98$  for a flat mirror, and solving Supplementary equation (3), we obtain the central angle  $\gamma$  for different powers  $P$  and at different distances  $d$ . The results are transferred back to the gripping angle  $\alpha$  using Supplementary equation (1), as shown in Supplementary Figure 3b in the main text.



Note that upon approaching to the closure stage the device reaches a small gripping angle,  $\alpha < 50^\circ$ , and the deformed geometry deviates significantly from the arc geometry approximation; at small distances,  $d < 5$  mm, the size of the LCE becomes comparable with the distance, enhancing the inaccuracy in the approximation treatment by using an average distance  $\bar{d}$ . Thus, there exists a relatively large divergence between the calculated and experimental results at large  $|d\alpha|$  and small  $d$  regimes.

All numerical calculations are performed with Matlab R2013a.
